# Supplementary material for: Local cell therapy using CCL19-expressing allogeneic mesenchymal stem cells exerts robust antitumor effects by accumulating CD103+ IL-12-producing dendritic cells and priming CD8+ T cells without involving draining lymph nodes
Source: PubMed Central journal article supplement — J Immunother Cancer. 2024 Dec 10;12(12):e009683. doi: 10.1136/jitc-2024-009683 (PMC11647367; doi:10.1136/jitc-2024-009683), 2024-12-10
Supplement: jitc-12-12-s001.pdf [file jitc-12-12-s001.pdf]

# Supplementary Figure 1

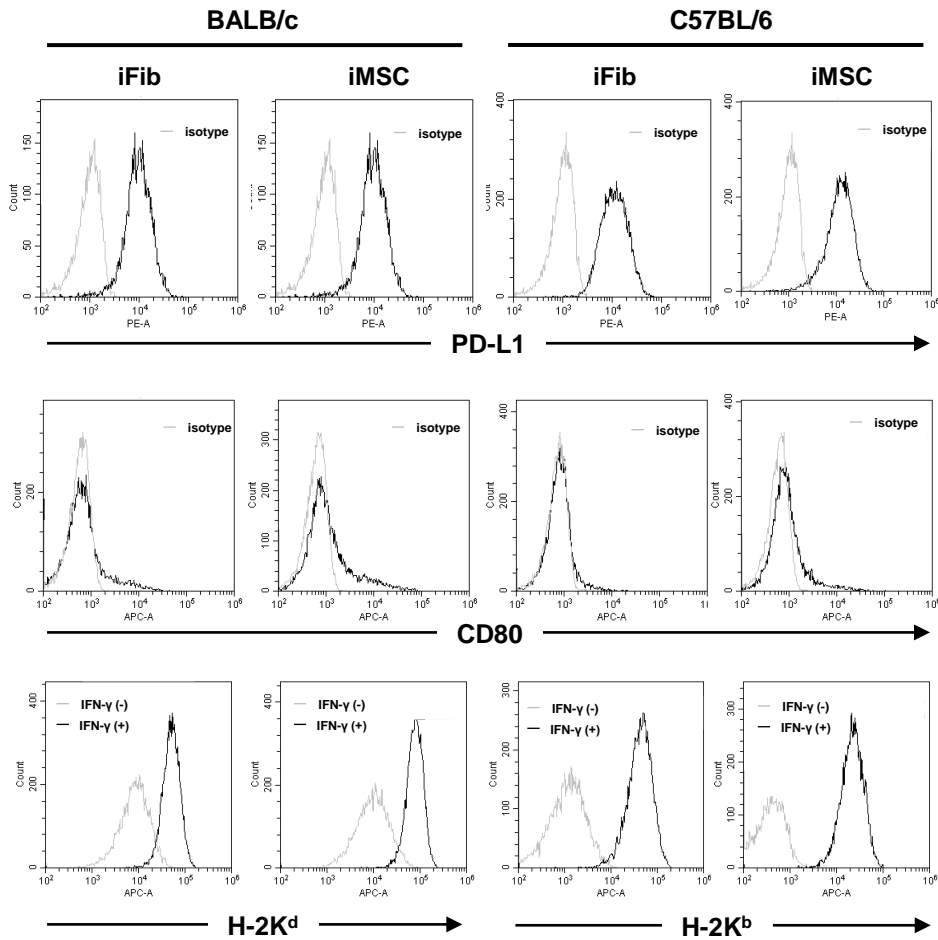

**No significant difference in the expression of PD-L1, CD80 and MHC class I between iFib and iMSC.** iFib and iMSC were cultured with 50 ng/ml IFN- $\gamma$  for 24hr. Their expression of PD-L1 and CD80 was evaluated by flow cytometry (upper and middle). iFib and iMSC were culture with or without 50 ng/ml IFN- $\gamma$ . After 24 hr, the expression of MHC class I (H-2K<sup>d</sup> or H-2K<sup>b</sup>) was evaluated by flow cytometry (lower).

## Supplementary Figure 2

A

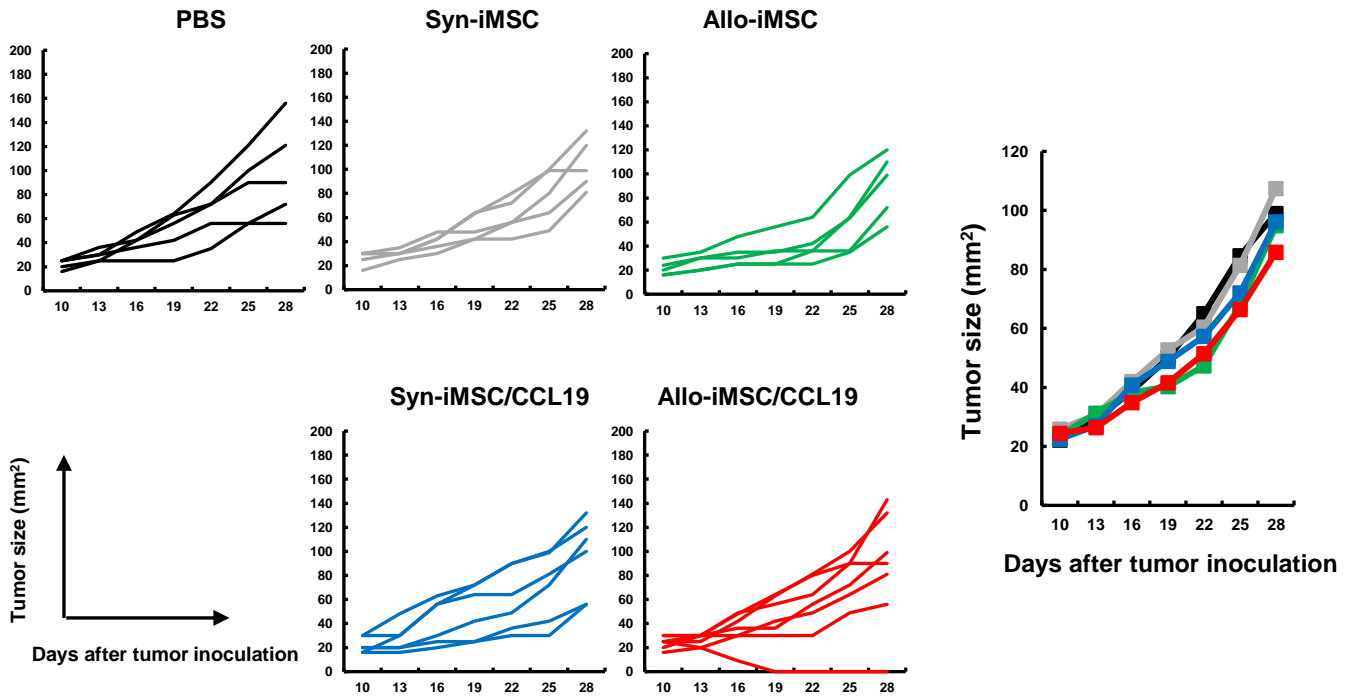

**The antitumor effect of Allo-iMSC/CCL19 therapy in RENCA tumor model.** BALB/c mice were s.c. injected with  $5 \times 10^5$  RENCA cells. Either syn-iMSC, allo-iMSC, syn-iMSC/CCL19 or allo-iMSC/CCL19 were injected i.t. on days 10 and 13 after tumor inoculation. Tumor sizes in individual mice (left) and mean  $\pm$  S.D. (right) are shown.

## Supplementary Figure 3

**A**

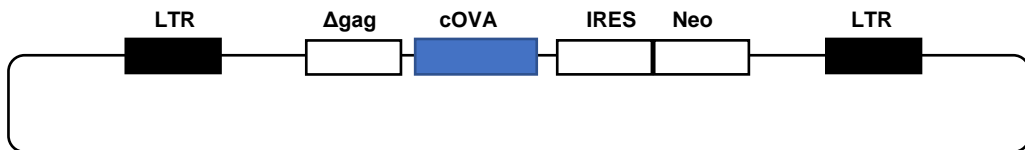

**B**

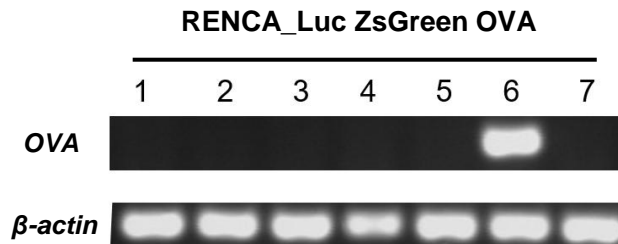

**Generation of an OVA-expressing RENCA cell line. (A)** The vector map of pWZLneo-cOVA. The retroviral vector containing OVA cDNA, pWZLneo-OVA, was constructed. The pBlueRIP-OVA vector including OVA cDNA was purchased from Addgene and then digested with HindIII and ligated to HindIII-digested pKO Scrambler V907 (V907-OVA). Next, V907-OVA was digested with BglIII and EcoRI, then ligated to BamHI and EcoRI-digested pWZLneo vector. pWZLneo-cOVA vector was transfected into Plat-E packaging cells (Cell Biolabs). 48 hrs after transfection, supernatant was collected to infect to RENCA Luc ZsGreen. Transfectants were cultured in medium with G418 (600  $\mu$ g/ml). **(B)** G418-resistant clones were picked up and then OVA mRNA expression was checked by genomic PCR method.

## Supplementary Figure 4

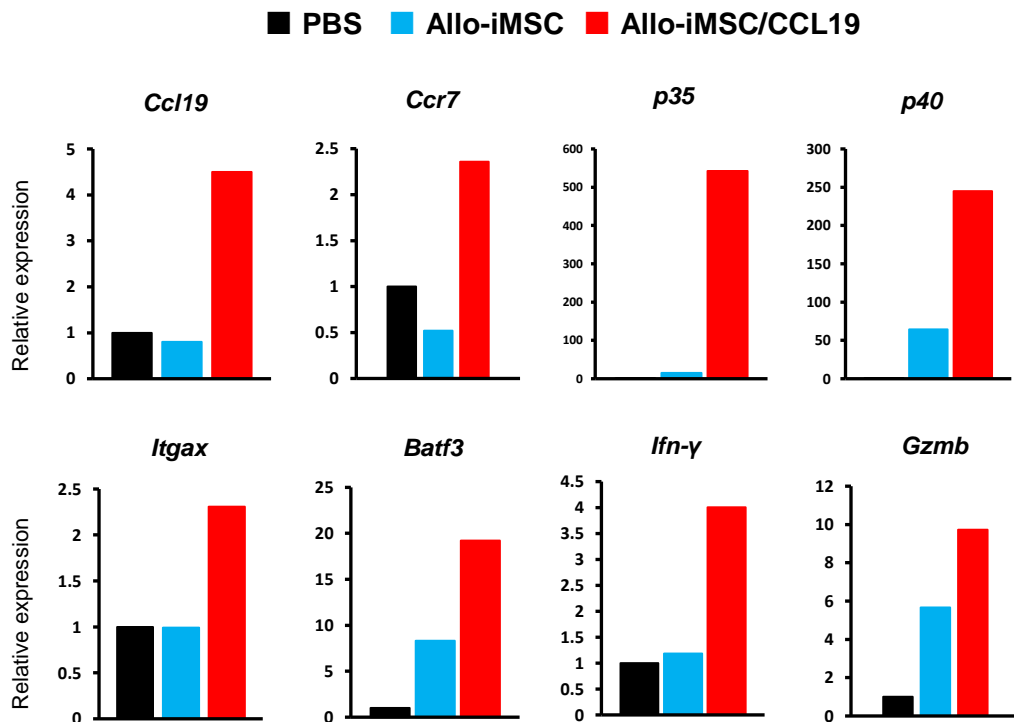

**Relative mRNA expression in tumor tissues after the local cell therapy.** CT26-bearing mice were injected i.t. with allo-iMSC or allo-iMSC/CCL19 on day 10 after tumor inoculation. Two days after cell therapy, tumor tissues were harvested and mRNAs were isolated. Quantitative RT-PCR were performed to detect mRNA expression of *Ccl19*, *Ccr7*, *p35*, *p40*, *Itgax*, *Batf3*, *Ifn- $\gamma$*  and *Gzmb*. mRNA expression of  $\beta$ -actin was evaluated as an internal control and normalized.

## Supplementary Figure 5

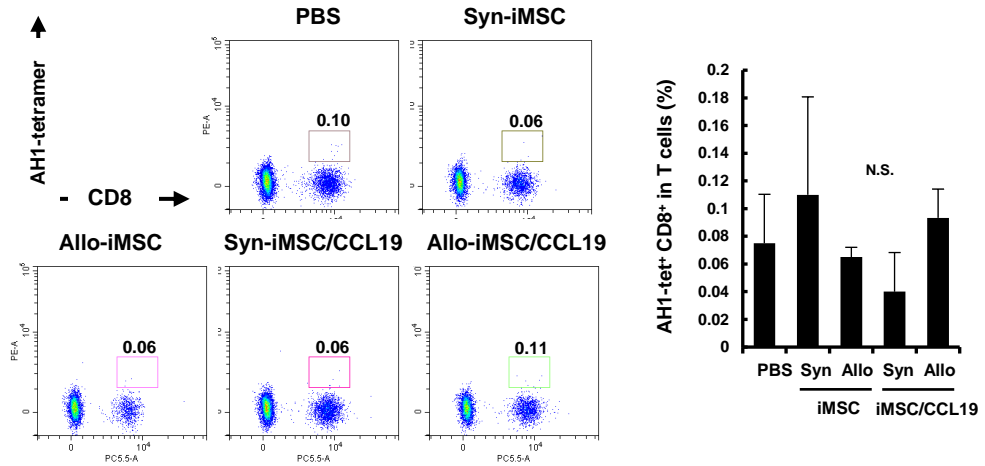

**Allo-iMSC/CCL19 therapy showed no effect on the percentages of tumor-specific CD8+ T cells in draining lymph nodes.** CT26-bearing mice were treated with PBS, Syn-iMSC, Allo-iMSC, Syn-iMSC/CCL19 or Allo-iMSC/CCL19 10 days after tumor inoculation. Draining lymph nodes were harvested on 12 days and analyzed by flow cytometry. Representative dot plots of AH1 (MuLV gp70 Tetramer)-tetramer+ CD8+ cells, gated on CD45+ CD3+ cells (left) and mean  $\pm$  S.D. (right) in draining lymph nodes are shown.

## Supplementary Figure 6

### Spleen

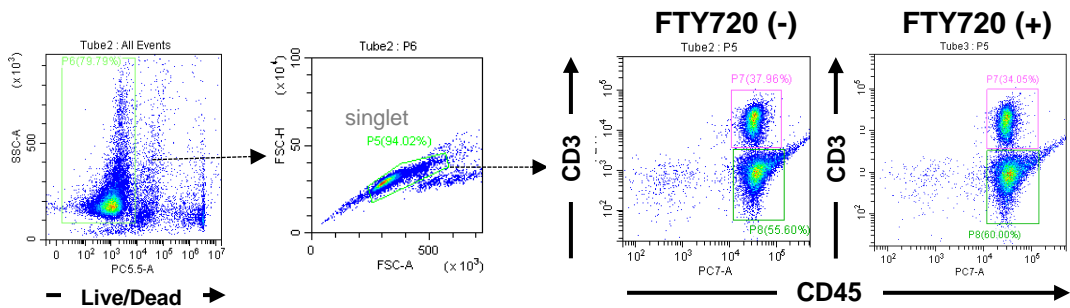

### Tumor

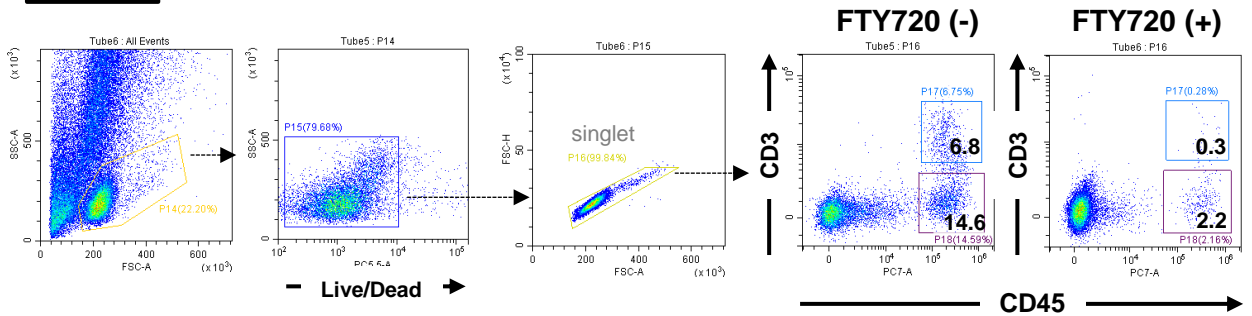

**FTY720 treatment decreased T cells in tumor sites.** CT26-bearing mice were injected i.p. with FTY720 (2 mg/kg). Spleen or tumors were harvested and CD45<sup>+</sup> CD3<sup>+</sup> cells were examined by flow cytometry. Propidium iodide (PI) were used to distinguish live and dead cells. Representative dot plots and the percentages of CD45<sup>+</sup> CD3<sup>+</sup> cells are shown.

# Supplementary Figure 7

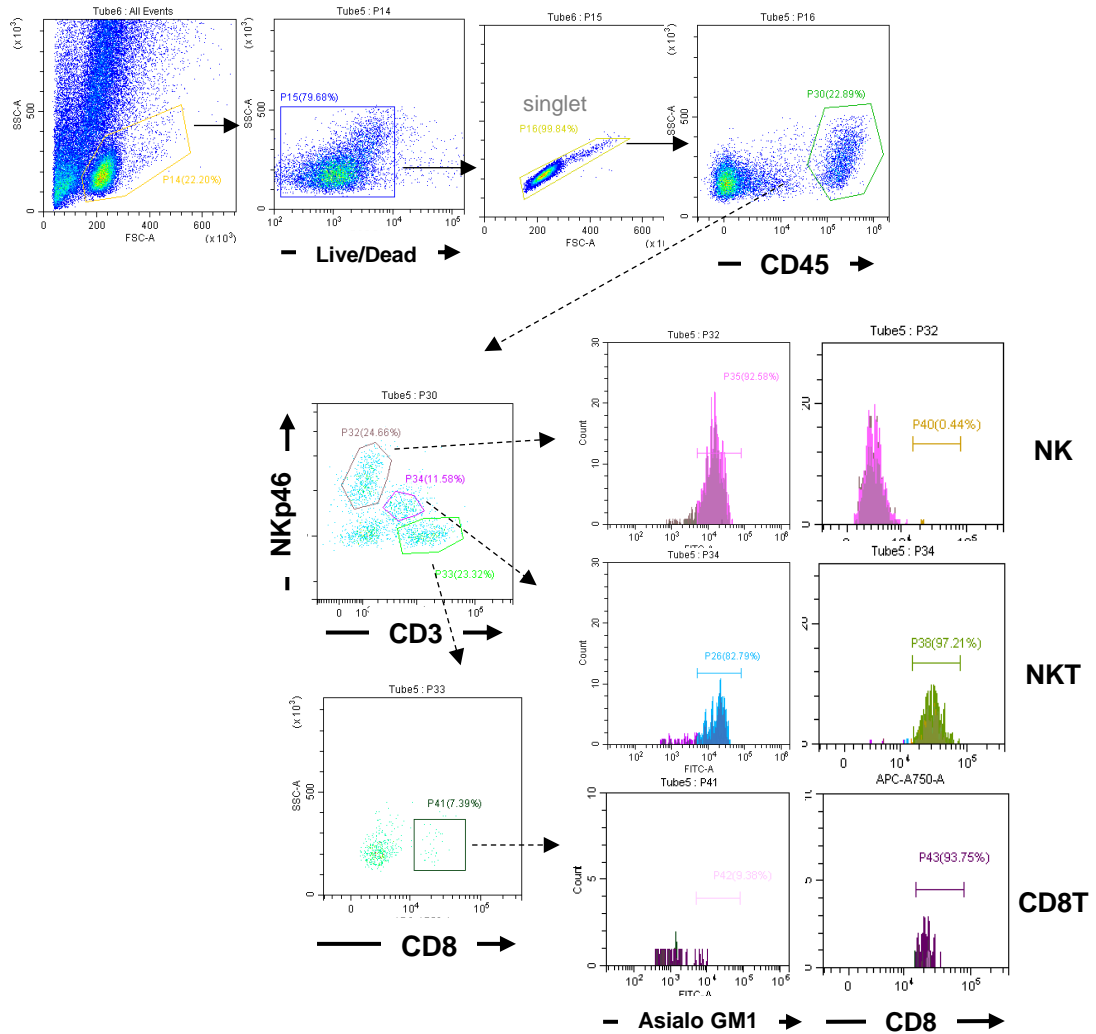

**Asialo GM1 is expressed on NK and NKT cells but not on T cells.** CT26 tumor were harvested and analyzed by flow cytometry. Propidium iodide (PI) were used to distinguish live and dead cells. Histogram and percentage of asialo GM1<sup>+</sup> cells among NK (NKp46<sup>+</sup> CD3<sup>-</sup>), NKT (NKp46<sup>middle</sup> CD3<sup>middle</sup>) and CD8T (NKp46<sup>-</sup> CD3<sup>+</sup> CD8<sup>+</sup>) cells are shown.
